# Supplementary material for: On the opto-electronic properties of phosphine and thiolate-protected undecagold nanoclusters
Source: Royal Society of Chemistry journal article supplement (doi:10.1039/c4cp02506g), 2014-01-01
Supplement: c4cp02506g1.pdf [file c4cp02506g1.pdf]

Electronic Supplementary Information

(ESI) for the article:

**“On the Opto-electronic Properties of Phosphine  
and Thiolate-protected Undecagold  
Nanoclusters”**

Francesco Muniz-Miranda,\* Maria Cristina Menziani, and Alfonso Pedone\*

*University of Modena and Reggio Emilia, Department of Chemical and Geological Sciences,  
Via G. Campi 183, 41125, Modena, Italy*

E-mail: francesco.munizmiranda@unimore.it; alfonso.pedone@unimore.it

---

\*To whom correspondence should be addressed

# XC Functionals on NC1 GIC Model

Time-dependent density functional calculations on the Gold-Inner-Core of  $\text{Au}_{11}(\text{PPh}_3)_7\text{Cl}_3$  with one explicit ligand molecule (**GIC+L** model in Figure 1 of the paper) have been carried out by employing the range-separated cam-B3LYP, the B3LYP and M06-HF hybrids, and the GGA B-PBE exchange-correlation (XC) functionals. For the  $\text{Au}_{11}(\text{PPh}_3)_7\text{Cl}_3$  (NC1) and  $\text{Au}_{11}(\text{PPh}_3)_7\text{SPyr}_3$  (NC2) nanoclusters these four XC functionals yielded fairly accurate structures.<sup>1</sup> The electronic spectra of the NC1 **GIC+L** model computed with these four functionals are reported in Fig. S1. The whole spectra (blue lines) have been obtained by convolving 100  $S_0 \rightarrow S_n$  transitions (red sticks in Fig. S1) with Gaussians of half-width at half height of 0.25 eV. No shift of the wavelengths was applied in this case. The results of calculations with cam-B3LYP, B3LYP, and M06-HF yield a very similar shape for the UV-Vis spectrum, with two very recognizable absorption bands separated of about 90 nm, in excellent agreement with the experimental value of 88 nm.

The shallow minimum at about 360 nm

in the B3LYP-calculated spectrum could be considered an artifact of the convolution procedure: reducing slightly the half-width of the Gaussian functions (*e.g.* to 0.2 eV), a shape very similar to those given by cam-B3LYP and M06-HF can be obtained. Also the transitions, approximated by the red spikes, appear quite similar for these three functionals. B3LYP yields the  $\lambda_{\text{max}}$  closer to the experimental values (316 and 406 nm), while cam-B3LYP-calculated wavelengths should be translated by a factor of about +50 nm for a better comparison with the UV-Vis experimental spectrum. The translating factor for M06-HF is greater than this ( $\sim 100$  nm).

The spectrum obtained employing the B-PBE XC functional shows a different general shape (blue line) and energetics (red spikes). While transitions calculated with cam-B3LYP/B3LYP/M06-HF functionals are clustered around two regions, those given by B-PBE appear spread in a wide range of wavelengths and the two characteristic peaks separated by  $\sim 90$  nm do not occur. However, the  $S_0 \rightarrow S_1$  transition

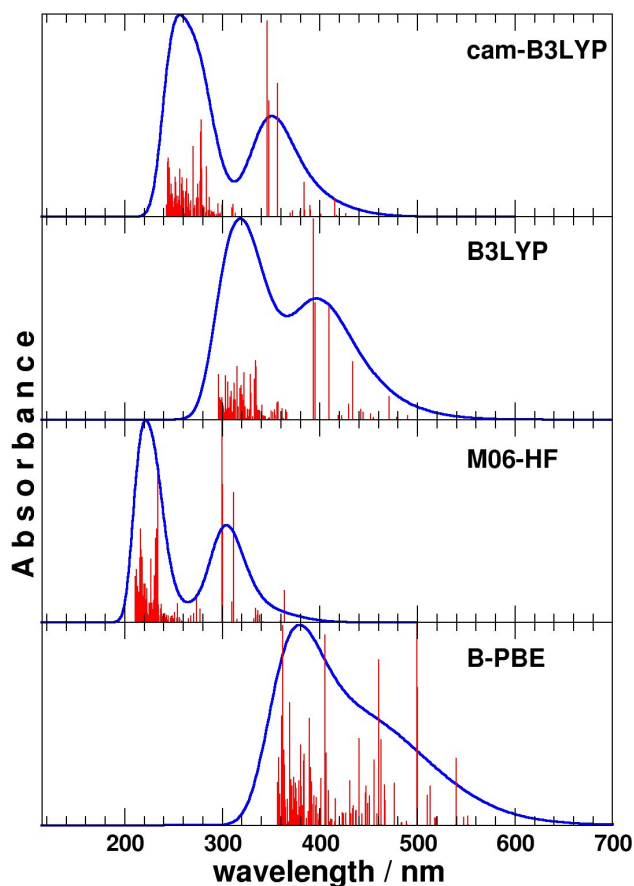

Figure S1: UV-Vis spectra (blue lines) of the NC1 **GIC+L** model obtained from the convolution of 100  $S_0 \rightarrow S_n$  transitions (red sticks) with Gaussians of half-width at half-height of 0.25 eV. Wavelengths have not been shifted.

(the so-called “optical-gap”<sup>2</sup>) is in agreement with the experimental-extrapolated one within  $\sim 0.1$  eV margin of error.<sup>3</sup> As was expected from theoretical considerations,<sup>2</sup>

this result was found with previous calculations employing a more limited basis set for the organic ligands.<sup>1</sup>

## Choice of Basis-Sets for $PPh_3$

In order to find the best compromise between accuracy and computational burden in the calculation of electronic spectrum of the full nanoclusters, a benchmarking of

various basis sets has been carried out for triphenylphosphine, ligand to both NC1 and NC2. Figure S2 displays the TD-DFT calculated optical spectra (computed by using

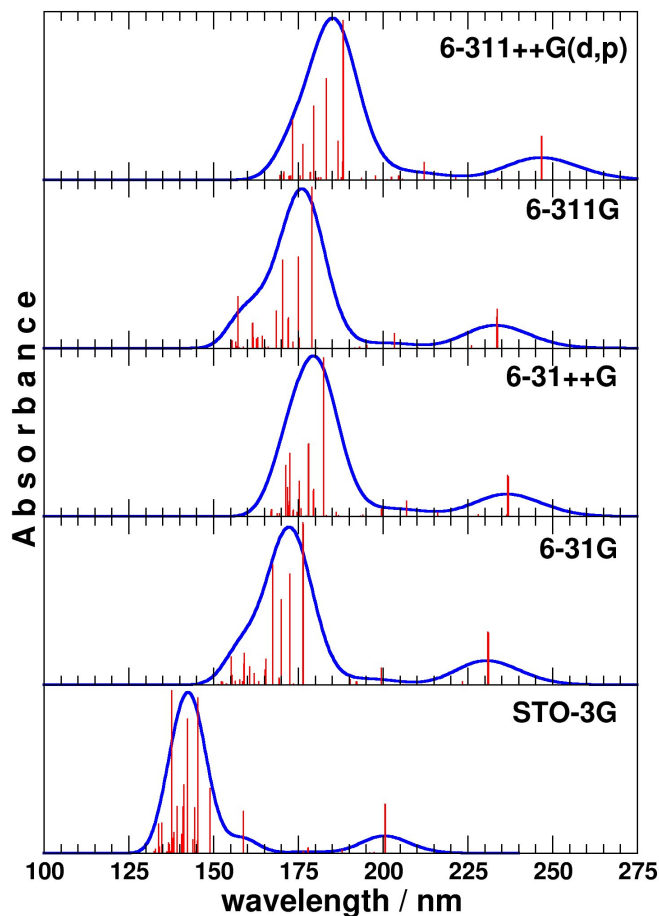

Figure S2: TD-DFT spectra of triphenylphosphine. 50  $S_0 \rightarrow S_n$  transitions have been taken into account. cam-B3LYP XC functional has been employed. Blue lines and red spikes denote spectra obtained by convolving the first 50  $S_0 \rightarrow S_n$  transitions with Gaussians of half-width at half-height of 0.25 eV. Wavelengths have not been shifted.

50  $S_0 \rightarrow S_n$  transitions) of  $\text{PPh}_3$  using cam-B3LYP and 5 different basis sets, namely STO-3G, 6-31G, 6-31++G, 6-311G and 6-311++G(d,p). Calculations have been performed on the optimized structure of  $\text{PPh}_3$  at the cam-B3LYP/6-311++G(d,p) level of theory. The spectrum obtained with 6-311++G(d,p) basis sets can be regarded as the reference calculation, at least for the

purposes of the present benchmarking.

As can be seen, both triple-zeta 6-311G and double-zeta 6-31G basis sets yield a distorted shape of the spectrum, with a clear shoulder at shorter wavelengths that is absent in the spectrum obtained with the reference basis set. Transitions provided by STO-3G calculations, the simplest basis-set tested here, are very blue-shifted, and the

shape of the spectrum is narrower than reference calculation. It has to be pinpointed that in previous full-DFT calculations<sup>1</sup> on NC1 and NC2, 6-31G and STO-3G basis sets have been employed to investigate the structural accuracy of the DFT approach and to recover the optical gap (*i.e.* the  $S_0 \rightarrow S_1$  transition energy).

Calculations performed by using the 6-31++G basis sets yield the spectrum in better agreement with the reference spectrum. The possible addition of polarization functions to this latter double-zeta basis sets (attempted but not reported) does not significantly improve the optical spectrum (only a very slight red-shift of the energies is observed), but severely hinders the feasibility

of TD-DFT calculations on the complete  $Au_{11}(PPh_3)_7Cl_3$  nanocluster. Thus, addition of two diffuse functions to the 6-31G basis-set seems to be preferred to adding polarization functions, and for this reason the 6-31++G basis-set has been adopted for the organic ligands in the computation reported in the main article. However, Cl and P atoms have been treated with a 6-31++G(d,p) basis-set to account for the hypervalence state of the latter. The main contribution to the first band of the UV-Vis spectrum of  $PPh_3$  at the cam-B3LYP/6-31++G level of theory is given by the transition between the HOMO and LUMO+1 Kohn-Sham molecular orbitals displayed in Figure S3.

## Excited States of the NC1 GIC+L Model

The most significant  $S_0 \rightarrow S_n$  transitions of the **GIC+L** model of NC1 (computed with cam-B3LYP functional) are reported in Table S1. Only transitions whose oscillator strength is greater than 0.0250 are reported there, with exception of excited states  $n=1$  and 144, for their relevance.

The occupied and virtual orbitals contributing to these transitions are reported as well, along the coefficient of the contribution (4<sup>th</sup> column). Most of the orbitals cited in Table 1 are also pictured in Figures S4 and S5 as contour levels. As can be appreciated, **GIC** $\rightarrow$ **GIC** transitions are ubiqui-

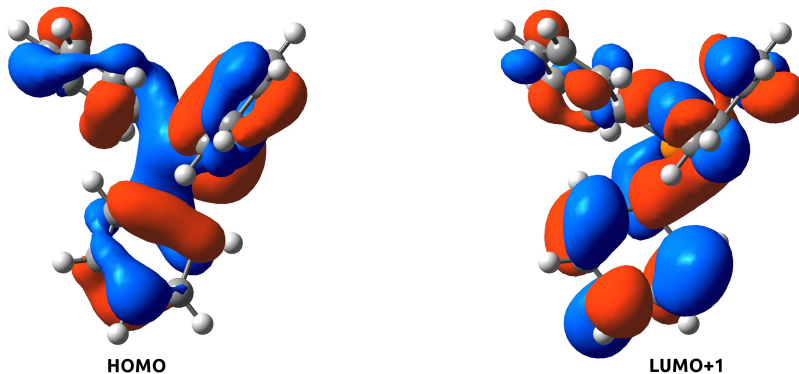

Figure S3: Contour levels for HOMO and LUMO+1 of triphenylphosphine at cam-B3LYP/6-31++G level of theory. These orbitals give the main contribution to the  $S_0 \rightarrow S_1$  transition of 5.23 eV (corresponding to  $\lambda = 237$  nm, oscillator strength  $f=0.1762$ ).

tous, while **GIC** $\rightarrow$ **L** transitions start giving some contributions from energies greater than  $\sim 4.3$  eV. **L** $\rightarrow$ **GIC** excitations occur only sporadically giving small contributions, starting from excited state  $n=170$  at 5.60 eV with the  $|227\rangle \rightarrow |254\rangle$  transition. **L** $\rightarrow$ **L** excitations appear to be even rarer in this range of energies, starting with state  $n=144$  at 5.44 eV receiving some very small contribution from  $|228\rangle \rightarrow |262\rangle$  transition.

It is also worth noticing that the first transition of triphenylphosphine (pictured in Fig. S2 at 5.23 eV, corresponding to  $\lambda = 237$  nm) cannot be traced back into the complex structure of the **GIC+L** model. In particular, none of the orbitals involved in transitions near 5.23 eV energy of the **GIC+L**

model are localized on the ligand. In fact, as stated above, only transition  $n=144$  (0.2 eV higher than the optical gap of triphenylphosphine) of the **GIC+L** model shows some **L** $\rightarrow$ **L** character, but even in this case the shape of the involved orbitals (*viz.* orbitals 228 and 262, pictured in Figures S5 and S4, respectively) are very different from those reported in Fig. S3 for HOMO and LUMO+1 of the isolated ligand.

Thus, while the electronic structure of the ligand has only minor effects on the global shape of the optical spectrum of the NC (at least for energies  $\leq 5.8$  eV), the former is severely affected and reshaped by the gold core.

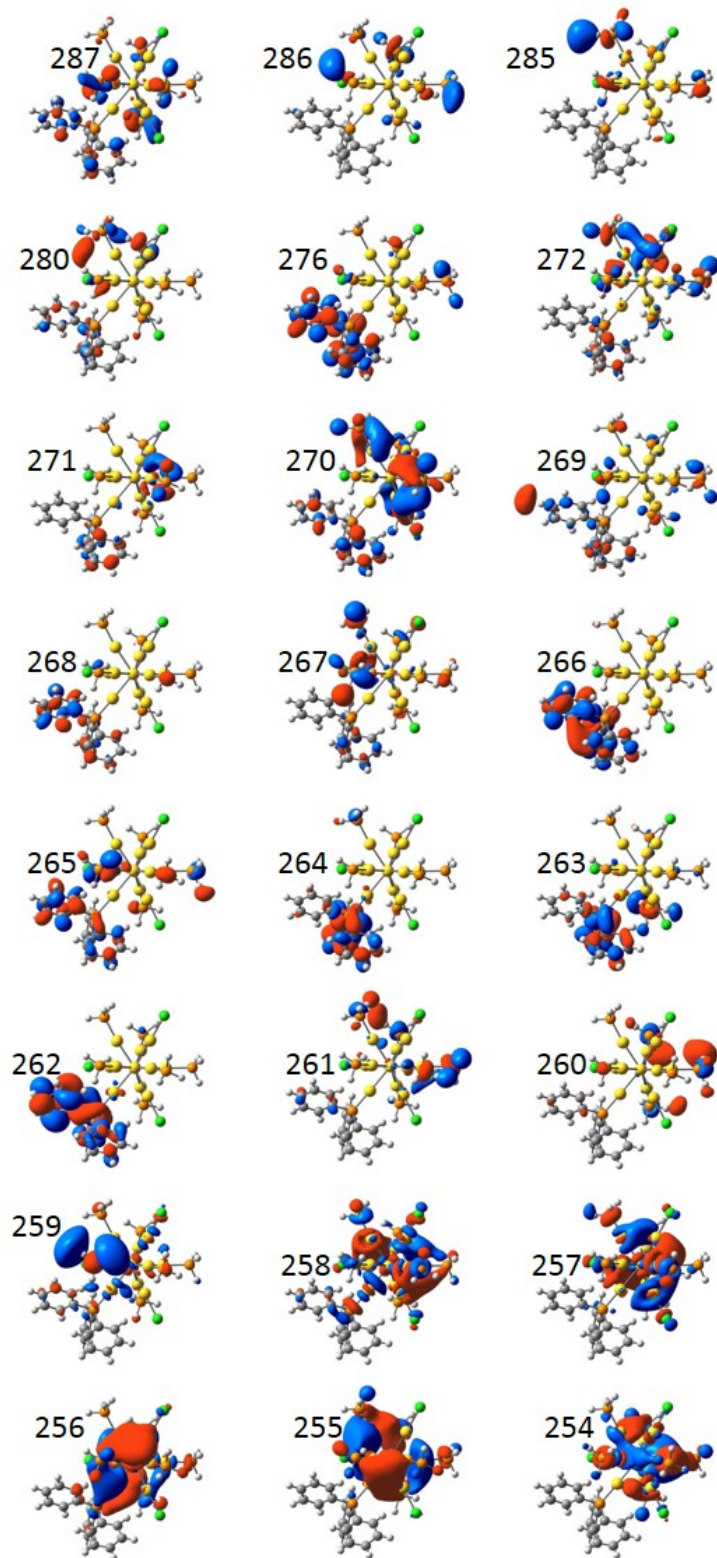

Figure S4: Contour levels of 24 **virtual** orbitals of the **GIC+L** model, at the cam-B3LYP/6-31++G level of theory. Orbital 254 is the LUMO (lower right).

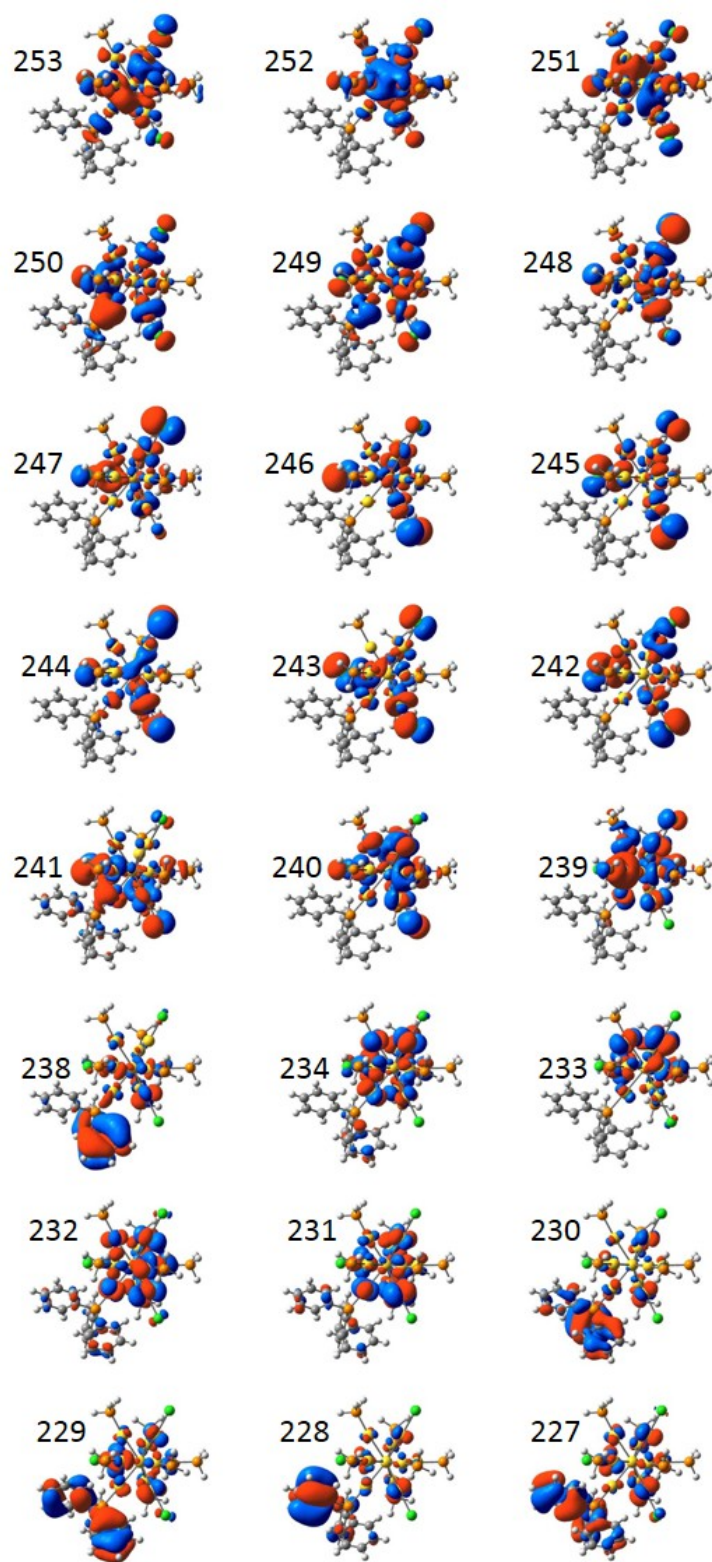

Figure S5: Contour levels of 24 **occupied** orbitals of the **GIC+L** model, at the cam-B3LYP/6-31++G level of theory. Orbital 253 is the HOMO (upper left).



**Table S1:** Pairs of orbitals giving contributions to 45 selected optical  $S_0 \rightarrow S_n$  transitions of the GIC+L model. The leftmost column indicates the number of the transition ( $n$ ). The 2<sup>nd</sup> and 3<sup>rd</sup> columns are the pairs of occupied and virtual orbitals involved into the transitions, respectively. The 4<sup>th</sup> column shows the relative contribution (CI coefficient) of the specific pair of orbitals to the transition. Contributions are ordered in decreasing absolute value. Oscillator strengths of the transitions multiplied by a  $10^4$  factor (5<sup>th</sup> column), their energies (6<sup>th</sup> column), and their corresponding wavelengths (7<sup>th</sup> column) are reported. Only transitions with oscillator strengths  $\geq 250 \cdot 10^{-4}$  have been reported, except for the first one and  $n=144$ , which are reported due to their relevance. Transitions marked with symbol \* are also (partially) reported inside the paper. Orbital 253 and 254 are the HOMO and LUMO, respectively. Calculations are performed on the GIC+L model at the cam-B3LYP/6-31++G level of theory.

| $n$ | $\langle$ In. orb. $\rangle$ | $\rightarrow$ | $\langle$ Fin. orb. $\rangle$ | CI coeff. | Osc. str. | En./eV | $\lambda/\text{nm}$ |
|-----|------------------------------|---------------|-------------------------------|-----------|-----------|--------|---------------------|
| 1*  | 253                          |               | 254                           | 0.65      | 41        | 2.91   | 426                 |
| 1   | 252                          |               | 254                           | 0.15      |           |        |                     |
| 1   | 253                          |               | 258                           | 0.12      |           |        |                     |
| 3   | 252                          |               | 254                           | 0.57      | 268       | 2.99   | 415                 |
| 3   | 253                          |               | 256                           | 0.26      |           |        |                     |
| 3   | 251                          |               | 255                           | 0.17      |           |        |                     |
| 3   | 251                          |               | 254                           | -0.14     |           |        |                     |
| 3   | 253                          |               | 254                           | -0.12     |           |        |                     |
| 9   | 251                          |               | 255                           | 0.38      | 504       | 3.23   | 384                 |
| 9   | 253                          |               | 257                           | 0.28      |           |        |                     |
| 9   | 251                          |               | 257                           | -0.25     |           |        |                     |
| 9   | 253                          |               | 256                           | 0.22      |           |        |                     |
| 9   | 253                          |               | 258                           | -0.20     |           |        |                     |
| 9   | 252                          |               | 254                           | -0.18     |           |        |                     |
| 9   | 252                          |               | 258                           | -0.12     |           |        |                     |
| 9   | 251                          |               | 258                           | -0.12     |           |        |                     |
| 13* | 251                          |               | 257                           | 0.34      | 1971      | 3.48   | 357                 |
| 13  | 253                          |               | 258                           | 0.28      |           |        |                     |
| 13  | 251                          |               | 255                           | 0.28      |           |        |                     |
| 13  | 253                          |               | 256                           | 0.23      |           |        |                     |
| 13  | 252                          |               | 258                           | 0.21      |           |        |                     |
| 13  | 252                          |               | 254                           | -0.19     |           |        |                     |
| 13  | 252                          |               | 259                           | 0.12      |           |        |                     |
| 14* | 251                          |               | 258                           | 0.46      | 1713      | 3.57   | 347                 |
| 14  | 252                          |               | 257                           | 0.27      |           |        |                     |
| 14  | 253                          |               | 257                           | 0.21      |           |        |                     |
| 14  | 251                          |               | 259                           | 0.17      |           |        |                     |
| 14  | 250                          |               | 257                           | -0.13     |           |        |                     |
| 14  | 252                          |               | 255                           | 0.13      |           |        |                     |
| 14  | 252                          |               | 258                           | 0.11      |           |        |                     |
| 15* | 253                          |               | 258                           | 0.42      | 2903      | 3.58   | 346                 |
| 15  | 251                          |               | 257                           | -0.39     |           |        |                     |
| 15  | 252                          |               | 256                           | -0.20     |           |        |                     |
| 15  | 253                          |               | 259                           | 0.15      |           |        |                     |
| 15  | 250                          |               | 258                           | -0.14     |           |        |                     |
| 31  | 247                          |               | 254                           | 0.27      | 282       | 4.33   | 287                 |
| 31  | 253                          |               | 259                           | 0.21      |           |        |                     |
| 31  | 251                          |               | 259                           | 0.19      |           |        |                     |
| 31  | 249                          |               | 256                           | 0.14      |           |        |                     |
| 31  | 253                          |               | 262                           | 0.14      |           |        |                     |
| 31  | 251                          |               | 261                           | 0.13      |           |        |                     |

| $n$ | $\langle \text{In. orb.} \rangle$ | $\rightarrow$ | $\langle \text{Fin. orb.} \rangle$ | CI coeff. | Osc. str. | En./eV | $\lambda/\text{nm}$ |
|-----|-----------------------------------|---------------|------------------------------------|-----------|-----------|--------|---------------------|
| 31  | 251                               |               | 270                                | -0.13     |           |        |                     |
| 31  | 246                               |               | 254                                | 0.12      |           |        |                     |
| 31  | 250                               |               | 257                                | -0.12     |           |        |                     |
| 31  | 251                               |               | 271                                | 0.12      |           |        |                     |
| 31  | 251                               |               | 258                                | -0.12     |           |        |                     |
| 31  | 251                               |               | 260                                | -0.11     |           |        |                     |
| 31  | 251                               |               | 263                                | 0.10      |           |        |                     |
| 31  | 251                               |               | 271                                | 0.12      |           |        |                     |
| 31  | 251                               |               | 258                                | -0.12     |           |        |                     |
| 31  | 251                               |               | 260                                | -0.11     |           |        |                     |
| 31  | 251                               |               | 263                                | 0.10      |           |        |                     |
| 33  | 253                               |               | 263                                | 0.24      | 739       | 4.37   | 284                 |
| 33  | 253                               |               | 261                                | 0.18      |           |        |                     |
| 33  | 253                               |               | 272                                | 0.18      |           |        |                     |
| 33  | 253                               |               | 262                                | -0.17     |           |        |                     |
| 33  | 247                               |               | 255                                | 0.15      |           |        |                     |
| 33  | 251                               |               | 259                                | 0.14      |           |        |                     |
| 33  | 253                               |               | 271                                | 0.14      |           |        |                     |
| 33  | 249                               |               | 256                                | -0.13     |           |        |                     |
| 33  | 250                               |               | 257                                | -0.13     |           |        |                     |
| 33  | 249                               |               | 255                                | 0.12      |           |        |                     |
| 33  | 251                               |               | 262                                | 0.11      |           |        |                     |
| 33  | 250                               |               | 258                                | -0.11     |           |        |                     |
| 33  | 253                               |               | 260                                | -0.10     |           |        |                     |
| 39  | 250                               |               | 257                                | 0.30      | 706       | 4.44   | 279                 |
| 39  | 248                               |               | 256                                | -0.26     |           |        |                     |
| 39  | 249                               |               | 257                                | -0.20     |           |        |                     |
| 39  | 247                               |               | 256                                | 0.17      |           |        |                     |
| 39  | 250                               |               | 258                                | -0.15     |           |        |                     |
| 39  | 245                               |               | 254                                | 0.12      |           |        |                     |
| 39  | 246                               |               | 256                                | 0.11      |           |        |                     |
| 39  | 252                               |               | 261                                | 0.11      |           |        |                     |
| 40* | 250                               |               | 257                                | 0.29      | 1436      | 4.46   | 278                 |
| 40  | 249                               |               | 255                                | 0.20      |           |        |                     |
| 40  | 249                               |               | 257                                | 0.20      |           |        |                     |
| 40  | 250                               |               | 258                                | 0.17      |           |        |                     |
| 40  | 247                               |               | 256                                | 0.15      |           |        |                     |
| 40  | 247                               |               | 258                                | -0.13     |           |        |                     |
| 40  | 245                               |               | 256                                | -0.12     |           |        |                     |
| 40  | 248                               |               | 257                                | 0.11      |           |        |                     |
| 40  | 253                               |               | 261                                | -0.11     |           |        |                     |
| 41  | 250                               |               | 258                                | 0.29      | 1250      | 4.46   | 278                 |
| 41  | 248                               |               | 257                                | -0.19     |           |        |                     |
| 41  | 248                               |               | 256                                | -0.19     |           |        |                     |
| 41  | 246                               |               | 255                                | 0.15      |           |        |                     |
| 41  | 245                               |               | 256                                | 0.14      |           |        |                     |
| 41  | 245                               |               | 255                                | 0.13      |           |        |                     |
| 41  | 247                               |               | 256                                | 0.11      |           |        |                     |
| 41  | 245                               |               | 254                                | 0.11      |           |        |                     |
| 41  | 249                               |               | 257                                | -0.10     |           |        |                     |
| 41  | 250                               |               | 259                                | 0.10      |           |        |                     |

| $n$ | $\langle$ In. orb. $\rangle$ | $\rightarrow$ | $ $ Fin. orb. $\rangle$ | CI coeff. | Osc. str. | En./eV | $\lambda$ /nm |
|-----|------------------------------|---------------|-------------------------|-----------|-----------|--------|---------------|
| 41  | 252                          |               | 260                     | 0.10      |           |        |               |
| 41  | 246                          |               | 257                     | -0.10     |           |        |               |
| 42  | 251                          |               | 260                     | 0.21      | 523       | 4.48   | 277           |
| 42  | 251                          |               | 270                     | -0.19     |           |        |               |
| 42  | 251                          |               | 263                     | -0.17     |           |        |               |
| 42  | 251                          |               | 259                     | -0.15     |           |        |               |
| 42  | 249                          |               | 255                     | 0.13      |           |        |               |
| 42  | 248                          |               | 258                     | 0.12      |           |        |               |
| 42  | 246                          |               | 254                     | 0.12      |           |        |               |
| 42  | 245                          |               | 254                     | 0.12      |           |        |               |
| 42  | 245                          |               | 255                     | 0.12      |           |        |               |
| 42  | 251                          |               | 272                     | -0.12     |           |        |               |
| 42  | 251                          |               | 267                     | 0.11      |           |        |               |
| 42  | 251                          |               | 265                     | -0.11     |           |        |               |
| 42  | 248                          |               | 256                     | -0.11     |           |        |               |
| 42  | 251                          |               | 261                     | 0.10      |           |        |               |
| 44  | 247                          |               | 255                     | 0.24      | 275       | 4.50   | 276           |
| 44  | 247                          |               | 256                     | -0.22     |           |        |               |
| 44  | 249                          |               | 258                     | -0.20     |           |        |               |
| 44  | 250                          |               | 258                     | 0.19      |           |        |               |
| 44  | 246                          |               | 257                     | 0.17      |           |        |               |
| 44  | 248                          |               | 256                     | -0.14     |           |        |               |
| 44  | 246                          |               | 255                     | -0.14     |           |        |               |
| 44  | 247                          |               | 257                     | -0.14     |           |        |               |
| 44  | 252                          |               | 263                     | -0.12     |           |        |               |
| 44  | 248                          |               | 254                     | 0.11      |           |        |               |
| 44  | 253                          |               | 262                     | -0.11     |           |        |               |
| 46  | 246                          |               | 256                     | 0.22      | 479       | 4.52   | 275           |
| 46  | 247                          |               | 255                     | -0.21     |           |        |               |
| 46  | 248                          |               | 255                     | -0.20     |           |        |               |
| 46  | 251                          |               | 260                     | 0.20      |           |        |               |
| 46  | 251                          |               | 259                     | 0.18      |           |        |               |
| 46  | 249                          |               | 257                     | -0.14     |           |        |               |
| 46  | 251                          |               | 270                     | 0.12      |           |        |               |
| 46  | 251                          |               | 263                     | 0.12      |           |        |               |
| 46  | 246                          |               | 258                     | -0.11     |           |        |               |
| 46  | 247                          |               | 258                     | -0.11     |           |        |               |
| 46  | 252                          |               | 261                     | -0.11     |           |        |               |
| 46  | 252                          |               | 261                     | -0.11     |           |        |               |
| 46  | 246                          |               | 255                     | -0.10     |           |        |               |
| 47  | 251                          |               | 260                     | 0.40      | 273       | 4.53   | 274           |
| 47  | 251                          |               | 259                     | 0.21      |           |        |               |
| 47  | 246                          |               | 256                     | -0.20     |           |        |               |
| 47  | 248                          |               | 257                     | -0.19     |           |        |               |
| 47  | 249                          |               | 257                     | 0.19      |           |        |               |
| 47  | 245                          |               | 256                     | -0.10     |           |        |               |
| 51  | 246                          |               | 255                     | 0.29      | 1036      | 4.59   | 270           |
| 51  | 249                          |               | 258                     | -0.28     |           |        |               |
| 51  | 246                          |               | 257                     | -0.19     |           |        |               |
| 51  | 248                          |               | 257                     | 0.18      |           |        |               |
| 51  | 247                          |               | 256                     | -0.16     |           |        |               |

| $n$ | $\langle$ In. orb. $\rangle$ | $\rightarrow$ | $ $ Fin. orb. $\rangle$ | CI coeff. | Osc. str. | En./eV | $\lambda$ /nm |
|-----|------------------------------|---------------|-------------------------|-----------|-----------|--------|---------------|
| 51  | 247                          |               | 255                     | -0.13     |           |        |               |
| 51  | 248                          |               | 255                     | 0.12      |           |        |               |
| 51  | 247                          |               | 258                     | 0.11      |           |        |               |
| 56  | 239                          |               | 255                     | 0.40      | 335       | 4.68   | 265           |
| 56  | 241                          |               | 255                     | -0.20     |           |        |               |
| 56  | 240                          |               | 254                     | -0.17     |           |        |               |
| 56  | 246                          |               | 254                     | -0.16     |           |        |               |
| 56  | 246                          |               | 258                     | -0.14     |           |        |               |
| 56  | 252                          |               | 261                     | -0.12     |           |        |               |
| 56  | 246                          |               | 257                     | 0.10      |           |        |               |
| 58  | 239                          |               | 256                     | 0.38      | 562       | 4.71   | 263           |
| 58  | 241                          |               | 256                     | -0.19     |           |        |               |
| 58  | 239                          |               | 254                     | -0.16     |           |        |               |
| 58  | 252                          |               | 261                     | 0.16      |           |        |               |
| 58  | 245                          |               | 257                     | 0.12      |           |        |               |
| 58  | 245                          |               | 255                     | 0.11      |           |        |               |
| 58  | 247                          |               | 254                     | 0.11      |           |        |               |
| 60  | 245                          |               | 255                     | 0.31      | 367       | 4.73   | 262           |
| 60  | 251                          |               | 261                     | 0.24      |           |        |               |
| 60  | 245                          |               | 256                     | 0.21      |           |        |               |
| 60  | 252                          |               | 261                     | 0.17      |           |        |               |
| 60  | 239                          |               | 256                     | -0.15     |           |        |               |
| 60  | 247                          |               | 255                     | -0.14     |           |        |               |
| 60  | 247                          |               | 256                     | -0.11     |           |        |               |
| 60  | 253                          |               | 264                     | -0.10     |           |        |               |
| 62  | 252                          |               | 261                     | 0.27      | 275       | 4.76   | 261           |
| 62  | 244                          |               | 254                     | 0.21      |           |        |               |
| 62  | 252                          |               | 263                     | -0.21     |           |        |               |
| 62  | 245                          |               | 258                     | 0.15      |           |        |               |
| 62  | 251                          |               | 261                     | -0.15     |           |        |               |
| 62  | 239                          |               | 255                     | 0.10      |           |        |               |
| 62  | 252                          |               | 267                     | -0.12     |           |        |               |
| 62  | 251                          |               | 263                     | 0.12      |           |        |               |
| 62  | 245                          |               | 255                     | -0.11     |           |        |               |
| 62  | 252                          |               | 270                     | 0.11      |           |        |               |
| 62  | 251                          |               | 267                     | 0.10      |           |        |               |
| 63  | 244                          |               | 254                     | 0.32      | 379       | 4.77   | 260           |
| 63  | 239                          |               | 256                     | 0.22      |           |        |               |
| 63  | 241                          |               | 254                     | 0.17      |           |        |               |
| 63  | 251                          |               | 261                     | 0.12      |           |        |               |
| 63  | 253                          |               | 263                     | 0.12      |           |        |               |
| 63  | 247                          |               | 257                     | 0.11      |           |        |               |
| 63  | 251                          |               | 267                     | -0.11     |           |        |               |
| 63  | 245                          |               | 256                     | 0.10      |           |        |               |
| 64  | 243                          |               | 254                     | 0.30      | 578       | 4.79   | 259           |
| 64  | 245                          |               | 257                     | -0.16     |           |        |               |
| 64  | 245                          |               | 256                     | 0.15      |           |        |               |
| 64  | 245                          |               | 258                     | 0.13      |           |        |               |
| 64  | 252                          |               | 263                     | 0.12      |           |        |               |
| 64  | 241                          |               | 254                     | -0.11     |           |        |               |
| 64  | 242                          |               | 254                     | -0.11     |           |        |               |

| $n$ | $\langle \text{In. orb.} \rangle$ | $\rightarrow$ | $\langle \text{Fin. orb.} \rangle$ | CI coeff. | Osc. str. | En./eV | $\lambda/\text{nm}$ |
|-----|-----------------------------------|---------------|------------------------------------|-----------|-----------|--------|---------------------|
| 64  | 251                               |               | 261                                | 0.11      |           |        |                     |
| 64  | 244                               |               | 256                                | -0.10     |           |        |                     |
| 65  | 251                               |               | 261                                | 0.29      | 470       | 4.81   | 258                 |
| 65  | 251                               |               | 262                                | -0.27     |           |        |                     |
| 65  | 245                               |               | 255                                | -0.17     |           |        |                     |
| 65  | 252                               |               | 263                                | -0.16     |           |        |                     |
| 65  | 251                               |               | 263                                | -0.15     |           |        |                     |
| 65  | 253                               |               | 263                                | -0.15     |           |        |                     |
| 65  | 253                               |               | 265                                | 0.13      |           |        |                     |
| 65  | 251                               |               | 270                                | 0.14      |           |        |                     |
| 65  | 253                               |               | 264                                | 0.10      |           |        |                     |
| 66  | 243                               |               | 254                                | 0.20      | 484       | 4.81   | 258                 |
| 66  | 244                               |               | 254                                | 0.19      |           |        |                     |
| 66  | 251                               |               | 263                                | -0.18     |           |        |                     |
| 66  | 242                               |               | 254                                | 0.17      |           |        |                     |
| 66  | 245                               |               | 257                                | 0.14      |           |        |                     |
| 66  | 252                               |               | 261                                | -0.13     |           |        |                     |
| 66  | 244                               |               | 257                                | 0.11      |           |        |                     |
| 66  | 245                               |               | 258                                | 0.11      |           |        |                     |
| 66  | 245                               |               | 256                                | -0.10     |           |        |                     |
| 68* | 253                               |               | 264                                | 0.37      | 701       | 4.83   | 256                 |
| 68  | 253                               |               | 265                                | 0.26      |           |        |                     |
| 68  | 253                               |               | 272                                | 0.14      |           |        |                     |
| 68  | 251                               |               | 263                                | 0.13      |           |        |                     |
| 68  | 253                               |               | 262                                | 0.13      |           |        |                     |
| 68  | 243                               |               | 254                                | -0.12     |           |        |                     |
| 68  | 251                               |               | 262                                | 0.12      |           |        |                     |
| 68  | 253                               |               | 266                                | 0.11      |           |        |                     |
| 68  | 253                               |               | 270                                | 0.11      |           |        |                     |
| 68  | 244                               |               | 256                                | -0.10     |           |        |                     |
| 71  | 241                               |               | 254                                | 0.23      | 302       | 4.87   | 255                 |
| 71  | 252                               |               | 264                                | 0.17      |           |        |                     |
| 71  | 241                               |               | 256                                | -0.16     |           |        |                     |
| 71  | 244                               |               | 255                                | 0.14      |           |        |                     |
| 71  | 242                               |               | 254                                | 0.12      |           |        |                     |
| 71  | 251                               |               | 262                                | -0.12     |           |        |                     |
| 71  | 252                               |               | 262                                | 0.12      |           |        |                     |
| 71  | 252                               |               | 269                                | 0.12      |           |        |                     |
| 71  | 239                               |               | 254                                | 0.11      |           |        |                     |
| 71  | 242                               |               | 255                                | 0.11      |           |        |                     |
| 71  | 252                               |               | 265                                | -0.11     |           |        |                     |
| 75  | 243                               |               | 255                                | 0.22      | 508       | 4.91   | 252                 |
| 75  | 240                               |               | 254                                | 0.21      |           |        |                     |
| 75  | 239                               |               | 254                                | 0.14      |           |        |                     |
| 75  | 245                               |               | 256                                | -0.14     |           |        |                     |
| 75  | 251                               |               | 267                                | -0.14     |           |        |                     |
| 75  | 252                               |               | 267                                | 0.14      |           |        |                     |
| 75  | 240                               |               | 257                                | -0.13     |           |        |                     |
| 75  | 239                               |               | 255                                | 0.12      |           |        |                     |
| 75  | 243                               |               | 254                                | -0.12     |           |        |                     |

| $n$ | $\langle$ In. orb. $\rangle$ | $\rightarrow$ | $ $ Fin. orb. $\rangle$ | CI coeff. | Osc. str. | En./eV | $\lambda$ /nm |
|-----|------------------------------|---------------|-------------------------|-----------|-----------|--------|---------------|
| 75  | 251                          |               | 265                     | -0.12     |           |        |               |
| 75  | 240                          |               | 258                     | 0.11      |           |        |               |
| 77  | 244                          |               | 256                     | 0.20      | 587       | 4.92   | 252           |
| 77  | 241                          |               | 256                     | -0.19     |           |        |               |
| 77  | 240                          |               | 256                     | -0.16     |           |        |               |
| 77  | 240                          |               | 257                     | -0.13     |           |        |               |
| 77  | 242                          |               | 256                     | -0.13     |           |        |               |
| 77  | 252                          |               | 262                     | -0.13     |           |        |               |
| 77  | 242                          |               | 255                     | 0.12      |           |        |               |
| 77  | 245                          |               | 256                     | 0.12      |           |        |               |
| 77  | 251                          |               | 265                     | 0.12      |           |        |               |
| 77  | 253                          |               | 267                     | -0.12     |           |        |               |
| 77  | 252                          |               | 267                     | 0.10      |           |        |               |
| 77  | 240                          |               | 254                     | -0.10     |           |        |               |
| 77  | 243                          |               | 256                     | 0.10      |           |        |               |
| 84  | 251                          |               | 264                     | 0.27      | 336       | 4.98   | 249           |
| 84  | 242                          |               | 256                     | 0.22      |           |        |               |
| 84  | 253                          |               | 265                     | -0.19     |           |        |               |
| 84  | 240                          |               | 255                     | 0.15      |           |        |               |
| 84  | 253                          |               | 272                     | 0.13      |           |        |               |
| 84  | 253                          |               | 267                     | -0.12     |           |        |               |
| 84  | 242                          |               | 255                     | 0.11      |           |        |               |
| 88  | 253                          |               | 265                     | 0.24      | 479       | 5.01   | 247           |
| 88  | 253                          |               | 266                     | -0.21     |           |        |               |
| 88  | 253                          |               | 270                     | -0.17     |           |        |               |
| 88  | 253                          |               | 272                     | -0.15     |           |        |               |
| 88  | 253                          |               | 267                     | -0.13     |           |        |               |
| 88  | 253                          |               | 268                     | -0.12     |           |        |               |
| 88  | 253                          |               | 269                     | 0.12      |           |        |               |
| 88  | 251                          |               | 262                     | -0.11     |           |        |               |
| 88  | 251                          |               | 274                     | 0.11      |           |        |               |
| 88  | 242                          |               | 254                     | 0.10      |           |        |               |
| 88  | 245                          |               | 257                     | -0.10     |           |        |               |
| 88  | 253                          |               | 274                     | -0.10     |           |        |               |
| 92  | 252                          |               | 267                     | 0.24      | 592       | 5.04   | 246           |
| 92  | 242                          |               | 256                     | -0.18     |           |        |               |
| 92  | 239                          |               | 257                     | 0.14      |           |        |               |
| 92  | 253                          |               | 267                     | 0.16      |           |        |               |
| 92  | 244                          |               | 258                     | -0.12     |           |        |               |
| 92  | 251                          |               | 265                     | -0.12     |           |        |               |
| 92  | 241                          |               | 255                     | -0.11     |           |        |               |
| 92  | 252                          |               | 265                     | 0.11      |           |        |               |
| 92  | 252                          |               | 268                     | 0.11      |           |        |               |
| 93  | 242                          |               | 256                     | 0.18      | 718       | 5.05   | 245           |
| 93  | 251                          |               | 267                     | 0.17      |           |        |               |
| 93  | 245                          |               | 257                     | -0.16     |           |        |               |
| 93  | 242                          |               | 254                     | 0.13      |           |        |               |
| 93  | 244                          |               | 258                     | -0.13     |           |        |               |
| 93  | 251                          |               | 264                     | -0.12     |           |        |               |
| 93  | 253                          |               | 266                     | 0.12      |           |        |               |
| 93  | 242                          |               | 257                     | 0.11      |           |        |               |

| $n$ | $\langle$ In. orb. $\rangle$ | $\rightarrow$ | $\langle$ Fin. orb. $\rangle$ | CI coeff. | Osc. str. | En./eV | $\lambda/\text{nm}$ |
|-----|------------------------------|---------------|-------------------------------|-----------|-----------|--------|---------------------|
| 93  | 243                          |               | 257                           | -0.11     |           |        |                     |
| 93  | 244                          |               | 254                           | -0.11     |           |        |                     |
| 93  | 251                          |               | 265                           | 0.11      |           |        |                     |
| 95  | 243                          |               | 257                           | 0.19      | 865       | 5.07   | 244                 |
| 95  | 251                          |               | 272                           | -0.18     |           |        |                     |
| 95  | 251                          |               | 268                           | 0.16      |           |        |                     |
| 95  | 239                          |               | 257                           | 0.15      |           |        |                     |
| 95  | 251                          |               | 265                           | 0.15      |           |        |                     |
| 95  | 243                          |               | 258                           | 0.14      |           |        |                     |
| 95  | 245                          |               | 258                           | 0.14      |           |        |                     |
| 95  | 250                          |               | 262                           | 0.11      |           |        |                     |
| 95  | 240                          |               | 255                           | -0.11     |           |        |                     |
| 95  | 241                          |               | 255                           | -0.11     |           |        |                     |
| 95  | 253                          |               | 272                           | 0.11      |           |        |                     |
| 96  | 251                          |               | 265                           | 0.20      | 552       | 5.08   | 244                 |
| 96  | 242                          |               | 257                           | -0.17     |           |        |                     |
| 96  | 251                          |               | 272                           | -0.17     |           |        |                     |
| 96  | 239                          |               | 256                           | -0.11     |           |        |                     |
| 96  | 240                          |               | 255                           | -0.14     |           |        |                     |
| 96  | 251                          |               | 268                           | 0.14      |           |        |                     |
| 96  | 241                          |               | 256                           | -0.13     |           |        |                     |
| 96  | 252                          |               | 267                           | 0.13      |           |        |                     |
| 96  | 244                          |               | 254                           | 0.11      |           |        |                     |
| 96  | 252                          |               | 271                           | 0.11      |           |        |                     |
| 97  | 251                          |               | 267                           | 0.22      | 810       | 5.08   | 244                 |
| 97  | 242                          |               | 257                           | -0.18     |           |        |                     |
| 97  | 251                          |               | 268                           | 0.15      |           |        |                     |
| 97  | 251                          |               | 271                           | 0.15      |           |        |                     |
| 97  | 251                          |               | 274                           | -0.14     |           |        |                     |
| 97  | 252                          |               | 267                           | -0.14     |           |        |                     |
| 97  | 243                          |               | 257                           | -0.14     |           |        |                     |
| 97  | 251                          |               | 269                           | 0.13      |           |        |                     |
| 97  | 251                          |               | 270                           | 0.13      |           |        |                     |
| 97  | 252                          |               | 272                           | -0.13     |           |        |                     |
| 97  | 235                          |               | 254                           | 0.12      |           |        |                     |
| 97  | 252                          |               | 270                           | -0.12     |           |        |                     |
| 97  | 251                          |               | 262                           | 0.11      |           |        |                     |
| 102 | 243                          |               | 257                           | 0.25      | 381       | 5.13   | 242                 |
| 102 | 240                          |               | 255                           | 0.16      |           |        |                     |
| 102 | 242                          |               | 258                           | 0.16      |           |        |                     |
| 102 | 244                          |               | 256                           | -0.14     |           |        |                     |
| 102 | 243                          |               | 256                           | 0.13      |           |        |                     |
| 102 | 241                          |               | 256                           | 0.12      |           |        |                     |
| 102 | 242                          |               | 255                           | 0.12      |           |        |                     |
| 102 | 244                          |               | 258                           | -0.11     |           |        |                     |
| 102 | 250                          |               | 259                           | 0.11      |           |        |                     |
| 108 | 252                          |               | 266                           | 0.32      | 395       | 5.18   | 239                 |
| 108 | 252                          |               | 268                           | 0.23      |           |        |                     |
| 108 | 252                          |               | 269                           | -0.21     |           |        |                     |
| 108 | 252                          |               | 265                           | -0.16     |           |        |                     |
| 108 | 252                          |               | 275                           | 0.16      |           |        |                     |

| $n$  | $\langle \text{In. orb.}  $ | $\rightarrow$ | $ \text{Fin. orb.}\rangle$ | CI coeff. | Osc. str. | En./eV | $\lambda/\text{nm}$ |
|------|-----------------------------|---------------|----------------------------|-----------|-----------|--------|---------------------|
| 108  | 252                         |               | 274                        | 0.14      |           |        |                     |
| 108  | 239                         |               | 257                        | -0.13     |           |        |                     |
| 108  | 241                         |               | 255                        | -0.13     |           |        |                     |
| 108  | 252                         |               | 270                        | 0.11      |           |        |                     |
| 109  | 235                         |               | 254                        | 0.18      | 334       | 5.19   | 239                 |
| 109  | 244                         |               | 257                        | 0.17      |           |        |                     |
| 109  | 240                         |               | 257                        | 0.16      |           |        |                     |
| 109  | 244                         |               | 255                        | 0.15      |           |        |                     |
| 109  | 242                         |               | 257                        | 0.13      |           |        |                     |
| 109  | 232                         |               | 254                        | -0.11     |           |        |                     |
| 109  | 240                         |               | 258                        | -0.11     |           |        |                     |
| 111  | 251                         |               | 266                        | 0.22      | 402       | 5.21   | 238                 |
| 111  | 250                         |               | 262                        | -0.16     |           |        |                     |
| 111  | 233                         |               | 254                        | 0.14      |           |        |                     |
| 111  | 234                         |               | 254                        | 0.14      |           |        |                     |
| 111  | 241                         |               | 257                        | -0.14     |           |        |                     |
| 111  | 251                         |               | 268                        | 0.14      |           |        |                     |
| 111  | 251                         |               | 269                        | -0.13     |           |        |                     |
| 111  | 251                         |               | 270                        | 0.13      |           |        |                     |
| 111  | 252                         |               | 266                        | 0.13      |           |        |                     |
| 111  | 245                         |               | 258                        | -0.12     |           |        |                     |
| 111  | 251                         |               | 265                        | -0.12     |           |        |                     |
| 144* | 253                         |               | 268                        | 0.15      | 158       | 5.44   | 228                 |
| 144  | 250                         |               | 259                        | 0.15      |           |        |                     |
| 144  | 253                         |               | 266                        | -0.14     |           |        |                     |
| 144  | 249                         |               | 259                        | -0.13     |           |        |                     |
| 144  | 252                         |               | 276                        | -0.13     |           |        |                     |
| 144  | 253                         |               | 278                        | 0.12      |           |        |                     |
| 144  | 253                         |               | 287                        | 0.12      |           |        |                     |
| 144  | 248                         |               | 260                        | 0.11      |           |        |                     |
| 144  | 252                         |               | 273                        | 0.11      |           |        |                     |
| 144  | 252                         |               | 278                        | -0.11     |           |        |                     |
| 144  | 252                         |               | 282                        | 0.11      |           |        |                     |
| 144  | 228                         |               | 262                        | 0.10      |           |        |                     |
| 144  | 253                         |               | 264                        | 0.10      |           |        |                     |
| 170* | 232                         |               | 257                        | 0.13      | 450       | 5.60   | 221                 |
| 170  | 229                         |               | 254                        | 0.13      |           |        |                     |
| 170  | 232                         |               | 257                        | 0.13      |           |        |                     |
| 170  | 234                         |               | 257                        | -0.12     |           |        |                     |
| 170  | 227                         |               | 254                        | -0.11     |           |        |                     |
| 170  | 248                         |               | 261                        | -0.11     |           |        |                     |
| 170  | 253                         |               | 272                        | 0.11      |           |        |                     |
| 170  | 253                         |               | 276                        | -0.11     |           |        |                     |
| 170  | 235                         |               | 258                        | 0.10      |           |        |                     |
| 186  | 234                         |               | 258                        | 0.18      | 410       | 5.70   | 218                 |
| 186  | 252                         |               | 280                        | -0.17     |           |        |                     |
| 186  | 252                         |               | 276                        | 0.15      |           |        |                     |
| 186  | 253                         |               | 285                        | -0.13     |           |        |                     |
| 186  | 253                         |               | 287                        | 0.12      |           |        |                     |
| 186  | 233                         |               | 258                        | 0.10      |           |        |                     |



| $n$ | $\langle \text{In. orb.}  $ | $\rightarrow$ | $ \text{Fin. orb.}\rangle$ | CI coeff. | Osc. str. | En./eV | $\lambda/\text{nm}$ |
|-----|-----------------------------|---------------|----------------------------|-----------|-----------|--------|---------------------|
| 186 | 251                         |               | 276                        | 0.10      |           |        |                     |
| 188 | 248                         |               | 259                        | 0.15      | 482       | 5.71   | 217                 |
| 188 | 248                         |               | 260                        | 0.13      |           |        |                     |
| 188 | 231                         |               | 258                        | 0.11      |           |        |                     |
| 188 | 251                         |               | 274                        | -0.11     |           |        |                     |
| 188 | 251                         |               | 280                        | 0.11      |           |        |                     |
| 188 | 251                         |               | 286                        | 0.10      |           |        |                     |
| 198 | 239                         |               | 259                        | 0.19      | 283       | 5.77   | 215                 |
| 198 | 231                         |               | 257                        | -0.16     |           |        |                     |
| 198 | 251                         |               | 280                        | -0.15     |           |        |                     |
| 198 | 247                         |               | 259                        | 0.13      |           |        |                     |
| 198 | 248                         |               | 262                        | 0.13      |           |        |                     |

## References

- (1) Muniz-Miranda, F.; Menziani, M. C.; Pedone, A. *The Journal of Physical Chemistry C* **2014**, *118*, 7532–7544.
- (2) Baerends, E. J.; Gritsenko, O. V.; van Meer, R. *Phys. Chem. Chem. Phys.* **2013**, *15*, 16408–16425.
- (3) Gutrath, B. S.; Englert, U.; Wang, Y.; Simon, U. *European Journal of Inorganic Chemistry* **2013**, *2013*, 2002–2006.
